# Supplementary material for: The Effect of CKD on Associations between Lifestyle Factors and All-cause, Cancer, and Cardiovascular Mortality: A Population-based Cohort Study
Source: PubMed Central journal article supplement — Intern Med. 2021 Feb 15;60(14):2189–200. doi: 10.2169/internalmedicine.6531-20 (PMC8355404; doi:10.2169/internalmedicine.6531-20), 2021-02-15
Supplement: 1349-7235-60-2189-s001.pdf [file 1349-7235-60-2189-s001.pdf]

**Supplementary material 1.** ICD-10 codes used to classify cause of death

| Cause of death         | ICD-10 code                                                                                                                                                                                                                                                                               |
|------------------------|-------------------------------------------------------------------------------------------------------------------------------------------------------------------------------------------------------------------------------------------------------------------------------------------|
| Cardiovascular disease | I20-I25,<br>I09.9, I11, I13, I25.5, I42, I43, I50, P29.0<br>G45-G46, H34.0, I60-I69<br>I44.1-I44.3, I45.6, I45.9, 146-149, R00.0, R00.1, R00.8, T82.1, Z45.0,<br>Z95.0<br>I05-I10, I34-I38<br>I26.9, I27, I31, I33, I51, I70-I79, T82.0, T82.2                                            |
| Infection              | A01-A04, A06-A09, B15-B19, K35-K38, K80-K82<br>I30.1, I40.0, T82.6<br>A50-A53, N11.0, N11.1, N39.0<br>A39, A83-A84, A85.2, G00-G02<br>A16-A19, A37, J00-J06, J9-J18, J20-J22<br>A40-A41<br>A00, A05, A20-A36, A38, A42-A44, A46, A48-A49, A54-A82,<br>A85.0A85.1, A85.8, A86-B09, B20-B99 |
| Cancer                 | C00-C97, D46<br>D10-D36                                                                                                                                                                                                                                                                   |
| Kidney disease         | N00-N29, E1X.2, I12                                                                                                                                                                                                                                                                       |
| Other                  | Every other code including those with typographical errors                                                                                                                                                                                                                                |
| Missing                | Missing codes                                                                                                                                                                                                                                                                             |
