# Supplementary material for: The Effect of CKD on Associations between Lifestyle Factors and All-cause, Cancer, and Cardiovascular Mortality: A Population-based Cohort Study
Source: PubMed Central journal article supplement — Intern Med. 2021 Feb 15;60(14):2189–200. doi: 10.2169/internalmedicine.6531-20 (PMC8355404; doi:10.2169/internalmedicine.6531-20), 2021-02-15
Supplement: 1349-7235-60-2189-s002.pdf [file 1349-7235-60-2189-s002.pdf]

**Supplementary material 2.** Baseline characteristics of participants by CKD status ( $n = 246,798$ , complete case analysis)

| Characteristic                      | Non-CKD<br>( $n = 202,349$ ) | CKD<br>( $n = 44,449$ ) |
|-------------------------------------|------------------------------|-------------------------|
| Age, years                          | 63.5±8.2                     | 66.4±6.5                |
| Males (%)                           | 75,291 (37.2)                | 23,171 (52.1)           |
| Healthy lifestyle score (%)         |                              |                         |
| 0                                   | 547 (0.3)                    | 130 (0.3)               |
| 1                                   | 5,522 (2.7)                  | 1,225 (2.8)             |
| 2                                   | 22,256 (11.0)                | 5,255 (11.8)            |
| 3                                   | 54,708 (27.0)                | 12,459 (28.0)           |
| 4                                   | 86,455 (42.7)                | 17,764 (40.0)           |
| 5                                   | 32,861 (16.2)                | 7,616 (17.1)            |
| Current smoker (%)                  | 27,151 (13.4)                | 5,760 (13.0)            |
| Body mass index, kg/m <sup>2</sup>  | 22.9±3.2                     | 23.8±3.4                |
| Alcohol >20 g/day (%)               | 30,773 (15.2)                | 7,031 (15.8)            |
| Regular exercise                    |                              |                         |
| Exercise to light sweat (%)         | 85,134 (42.1)                | 21,864 (49.2)           |
| Walking >1 hr/day (%)               | 104,043 (51.4)               | 23,708 (53.3)           |
| Eating habit                        |                              |                         |
| Snacks after supper (%)             | 27,974 (13.8)                | 5,733 (12.9)            |
| Skipping breakfast (%)              | 19,443 (9.6)                 | 3,932 (8.8)             |
| History                             |                              |                         |
| Stroke (%)                          | 6,774 (3.3)                  | 2,796 (6.3)             |
| Heart disease (%)                   | 11,813 (5.8)                 | 4,434 (10.0)            |
| Comorbidity                         |                              |                         |
| Hypertension (%)                    | 86,002 (42.5)                | 25,746 (57.9)           |
| Systolic BP, mmHg                   | 128±17                       | 132±18                  |
| Diastolic BP, mmHg                  | 76±11                        | 77±11                   |
| Anti-hypertensive medication (%)    | 53,794 (26.6)                | 18,440 (41.5)           |
| Diabetes                            | 18,517 (9.2)                 | 6,270 (14.1)            |
| Hemoglobin A <sub>1c</sub> , %      | 5.8±0.7                      | 5.9±0.8                 |
| Anti-diabetic medication (%)        | 8,862 (4.4)                  | 3,460 (7.8)             |
| Hypercholesterolemia                | 85,341 (42.2)                | 23,630 (46.8)           |
| LDL cholesterol, mg/dl              | 126±30                       | 126±31                  |
| Cholesterol-lowering medication (%) | 30,138 (14.9)                | 8,882 (20.0)            |
| Proteinuria (%)                     | 0 (0)                        | 14,262 (29.4)           |
| Serum Cr, mg/dl                     | 0.67±0.13                    | 0.94±0.42               |
| eGFR, ml/min/1.73 m <sup>2</sup>    | 79±14                        | 58±14                   |
| CKD stage 1-2 (%)                   | -                            | 9,604 (21.6%)           |
| G3a (%)                             | -                            | 31,188 (70.2%)          |
| G3b (%)                             | -                            | 3,038 (6.8%)            |
| G4-5 (%)                            | -                            | 619 (1.4%)              |

Data are presented as mean±standard deviation or number (percentage). All percentages may not total 100% due to rounding.

BP, blood pressure; CKD, chronic kidney disease; Cr, creatinine; eGFR, estimated glomerular filtration rate; LDL, low-density lipoprotein.

The definitions of the clinical characteristics are provided in the text.
