# Supplementary material for: The Effect of CKD on Associations between Lifestyle Factors and All-cause, Cancer, and Cardiovascular Mortality: A Population-based Cohort Study
Source: PubMed Central journal article supplement — Intern Med. 2021 Feb 15;60(14):2189–200. doi: 10.2169/internalmedicine.6531-20 (PMC8355404; doi:10.2169/internalmedicine.6531-20), 2021-02-15
Supplement: 1349-7235-60-2189-s003.pdf [file 1349-7235-60-2189-s003.pdf]

### Supplementary material 3. Baseline characteristics of included and excluded participants

| Characteristics                     | Excluded participants<br>( <i>N</i> = 116,780) |             | Included<br>participants<br>( <i>N</i> = 262,011) |
|-------------------------------------|------------------------------------------------|-------------|---------------------------------------------------|
|                                     | No. of missing values<br>(%)                   |             |                                                   |
| Age, years                          | 10 (<0.1)                                      | 62.9 ± 8.5  | 64.1 ± 8.0                                        |
| Males (%)                           | 0                                              | 41.7        | 39.9                                              |
| Healthy lifestyle score (%)         | 85,281 (73.0)                                  |             |                                                   |
| 0                                   |                                                | 0.2         | 0.3                                               |
| 1                                   |                                                | 2.5         | 2.7                                               |
| 2                                   |                                                | 11.0        | 11.0                                              |
| 3                                   |                                                | 27.7        | 27.1                                              |
| 4                                   |                                                | 43.3        | 42.3                                              |
| 5                                   |                                                | 15.3        | 16.6                                              |
| Current smoker (%)                  | 108 (0.1)                                      | 14.6        | 13.2                                              |
| Body mass index, kg/m <sup>2</sup>  | 55 (<0.1)                                      | 23.4 ± 3.4  | 23.1 ± 3.3                                        |
| Alcohol >20 g/day (%)               | 26,335 (22.6)                                  | 11.2        | 15.3                                              |
| Regular exercise                    |                                                |             |                                                   |
| Exercise to light sweat (%)         | 77,913 (66.7)                                  | 40.5        | 43.6                                              |
| Walking >1 hr/day (%)               | 81,253 (69.6)                                  | 47.4        | 51.8                                              |
| Eating habit                        |                                                |             |                                                   |
| Snacks after supper (%)             | 80,554 (69.0)                                  | 12.0        | 13.5                                              |
| Skipping breakfast (%)              | 80,917 (69.3)                                  | 7.5         | 9.4                                               |
| History                             |                                                |             |                                                   |
| Stroke (%)                          | 13,405 (11.5)                                  | 3.1         | 3.9                                               |
| Heart disease (%)                   | 13,457 (11.5)                                  | 5.6         | 6.6                                               |
| Comorbidity                         |                                                |             |                                                   |
| Hypertension (%)                    | 128 (0.1)                                      | 45.7        | 45.3                                              |
| Systolic BP, mmHg                   | 41 (<0.1)                                      | 129 ± 17    | 129 ± 17                                          |
| Diastolic BP, mmHg                  | 47 (<0.1)                                      | 77 ± 11     | 76 ± 11                                           |
| Anti-hypertensive medication (%)    | 102 (0.1)                                      | 28.8        | 29.3                                              |
| Diabetes                            | 4,889 (4.2)                                    | 9.7         | 10.2                                              |
| Hemoglobin A <sub>1c</sub> , %      | 5,026 (4.3)                                    | 5.7 ± 0.7   | 5.8 ± 0.7                                         |
| Anti-diabetic medication (%)        | 110 (0.1)                                      | 5.1         | 4.9                                               |
| Hypercholesterolemia                | 133 (0.1)                                      | 41.4        | 43.0                                              |
| LDL cholesterol, mg/dl              | 47 (0.0)                                       | 125 ± 31    | 126 ± 31                                          |
| Cholesterol-lowering medication (%) | 107 (0.1)                                      | 14.5        | 15.7                                              |
| CKD (%)                             | 56,563 (48.4)                                  | 20.1        | 18.5                                              |
| Stage 1-2 (%)                       |                                                | 3.5         | 3.8                                               |
| G3a (%)                             |                                                | 14.7        | 13.1                                              |
| G3b (%)                             |                                                | 1.6         | 1.3                                               |
| G4-5 (%)                            |                                                | 0.3         | 0.3                                               |
| Proteinuria (%)                     | 663 (0.6)                                      | 5.0         | 5.4                                               |
| Serum Cr, mg/dl                     | 56,114 (48.1)                                  | 0.75 ± 0.31 | 0.72 ± 0.24                                       |

Data are presented as mean±standard deviation or percentage. All percentages may not total 100% due to rounding. BP, blood pressure; CKD, chronic kidney disease; Cr, creatinine; LDL, low-density lipoprotein.
