# Supplementary material for: The Effect of CKD on Associations between Lifestyle Factors and All-cause, Cancer, and Cardiovascular Mortality: A Population-based Cohort Study
Source: PubMed Central journal article supplement — Intern Med. 2021 Feb 15;60(14):2189–200. doi: 10.2169/internalmedicine.6531-20 (PMC8355404; doi:10.2169/internalmedicine.6531-20), 2021-02-15
Supplement: 1349-7235-60-2189-s004.pdf [file 1349-7235-60-2189-s004.pdf]

## Supplementary material 4. Baseline characteristics of participants by healthy lifestyle score

| Characteristics                     | Healthy lifestyle score at baseline |                           |                             |                             |                              |                             | P for trend |
|-------------------------------------|-------------------------------------|---------------------------|-----------------------------|-----------------------------|------------------------------|-----------------------------|-------------|
|                                     | 0<br>(n = 712<br>[0.3%])            | 1<br>(n = 7075<br>[2.7%]) | 2<br>(n = 28909<br>[11.0%]) | 3<br>(n = 70946<br>[27.1%]) | 4<br>(n = 110782<br>[42.3%]) | 5<br>(n = 43587<br>[16.6%]) |             |
| Age, years                          | 55.8 ± 9.3                          | 57.8 ± 9.5                | 61.0 ± 9.0                  | 63.3 ± 8.3                  | 64.8 ± 7.5                   | 66.7 ± 6.0                  | < 0.001     |
| Males (%)                           | 88.6                                | 80.4                      | 64.7                        | 45.7                        | 30.0                         | 31.6                        | < 0.001     |
| Current smoker (%)                  | 100.0                               | 82.7                      | 46.8                        | 16.2                        | 2.7                          | 0.0                         | < 0.001     |
| Body mass index, kg/m <sup>2</sup>  | 27.4 ± 2.9                          | 25.4 ± 3.6                | 25.0 ± 3.7                  | 24.3 ± 3.5                  | 22.2 ± 2.7                   | 21.7 ± 2.0                  | < 0.001     |
| Alcohol >20 g/day (%)               | 100.0                               | 72.1                      | 44.8                        | 20.8                        | 6.0                          | 0.0                         | < 0.001     |
| Regular exercise                    |                                     |                           |                             |                             |                              |                             |             |
| Exercise to light sweat (%)         | 11.5                                | 14.7                      | 20.5                        | 28.6                        | 39.2                         | 100.0                       | < 0.001     |
| Walking >1 h per day (%)            | 27.9                                | 27.7                      | 32.5                        | 38.9                        | 47.7                         | 100.0                       | < 0.001     |
| Eating habit                        |                                     |                           |                             |                             |                              |                             |             |
| Snacks after supper (%)             | 44.7                                | 38.4                      | 36.2                        | 23.5                        | 4.8                          | 0.0                         | < 0.001     |
| Skipping breakfast (%)              | 72.8                                | 56.6                      | 30.2                        | 12.8                        | 2.1                          | 0.0                         | < 0.001     |
| History                             |                                     |                           |                             |                             |                              |                             |             |
| Stroke (%)                          | 2.2                                 | 2.9                       | 3.9                         | 4.2                         | 3.8                          | 3.7                         | 0.48        |
| Heart disease (%)                   | 5.0                                 | 5.5                       | 6.7                         | 6.9                         | 6.5                          | 6.3                         | 0.24        |
| Comorbidity                         |                                     |                           |                             |                             |                              |                             |             |
| Hypertension (%)                    | 58.1                                | 51.7                      | 51.3                        | 49.3                        | 42.2                         | 41.8                        | < 0.001     |
| Systolic BP, mmHg                   | 134 ± 18                            | 132 ± 18                  | 131 ± 18                    | 130 ± 17                    | 128 ± 17                     | 128 ± 17                    | < 0.001     |
| Diastolic BP, mmHg                  | 82 ± 12                             | 79 ± 11                   | 78 ± 11                     | 77 ± 11                     | 75 ± 10                      | 75 ± 10                     | < 0.001     |
| Anti-hypertensive medication (%)    | 32.4                                | 29.6                      | 32.5                        | 33.0                        | 27.2                         | 26.6                        | < 0.001     |
| Diabetes                            | 15.6                                | 14.2                      | 12.9                        | 11.5                        | 8.4                          | 9.5                         | < 0.001     |
| Hemoglobin A <sub>1c</sub> , %      | 5.9 ± 0.9                           | 5.8 ± 0.9                 | 5.8 ± 0.8                   | 5.8 ± 0.7                   | 5.7 ± 0.6                    | 5.8 ± 0.6                   | < 0.001     |
| Anti-diabetic medication (%)        | 5.9                                 | 5.9                       | 5.7                         | 5.4                         | 4.2                          | 5.2                         | < 0.001     |
| Hypercholesterolemia                | 37.6                                | 34.9                      | 39.1                        | 43.4                        | 43.7                         | 44.7                        | < 0.001     |
| LDL cholesterol, mg/dl              | 123 ± 33                            | 120 ± 34                  | 123 ± 33                    | 126 ± 31                    | 126 ± 30                     | 127 ± 29                    | < 0.001     |
| Cholesterol-lowering medication (%) | 9.8                                 | 10.0                      | 12.6                        | 15.7                        | 16.2                         | 17.5                        | < 0.001     |
| CKD (%)                             | 19.2                                | 18.4                      | 19.5                        | 19.0                        | 17.5                         | 19.5                        | 0.02        |
| Stage 1-2 (%)                       | 11.0                                | 8.1                       | 6.3                         | 4.4                         | 3.0                          | 2.5                         |             |
| G3a (%)                             | 7.7                                 | 9.0                       | 11.7                        | 12.8                        | 13.1                         | 15.4                        |             |
| G3b (%)                             | 0.4                                 | 1.0                       | 1.3                         | 1.4                         | 1.2                          | 1.3                         |             |
| G4-5 (%)                            | 0.1                                 | 0.2                       | 0.2                         | 0.3                         | 0.3                          | 0.2                         |             |
| Proteinuria (%)                     | 12.6                                | 10.0                      | 8.4                         | 6.3                         | 4.4                          | 3.8                         | < 0.001     |
| Serum Cr, mg/dl                     | 0.78 ± 0.16                         | 0.77 ± 0.21               | 0.76 ± 0.27                 | 0.73 ± 0.24                 | 0.70 ± 0.22                  | 0.71 ± 0.26                 | < 0.001     |
| eGFR, ml/min/1.73 m <sup>2</sup>    | 81 ± 17                             | 80 ± 19                   | 77 ± 17                     | 76 ± 17                     | 75 ± 16                      | 72 ± 16                     | < 0.001     |

Data are presented as mean ± standard deviation or percentage. All percentages may not total 100% due to rounding. BMI, body mass index; BP, blood pressure; CKD, chronic kidney disease; Cr, creatinine; eGFR, estimated glomerular filtration rate; LDL, low-density lipoprotein.
