# Supplementary material for: The Effect of CKD on Associations between Lifestyle Factors and All-cause, Cancer, and Cardiovascular Mortality: A Population-based Cohort Study
Source: PubMed Central journal article supplement — Intern Med. 2021 Feb 15;60(14):2189–200. doi: 10.2169/internalmedicine.6531-20 (PMC8355404; doi:10.2169/internalmedicine.6531-20), 2021-02-15
Supplement: 1349-7235-60-2189-s005.pdf [file 1349-7235-60-2189-s005.pdf]

**Supplementary material 5. Sex- and age-standardized mortality rate ratio (SMR) according to CKD category**

| Cause of death           | CKD category  | No. of Actual Deaths | No. of Expected Deaths <sup>a</sup> | SMR     | (95% CI)          |
|--------------------------|---------------|----------------------|-------------------------------------|---------|-------------------|
| All-cause deaths         | Non-CKD       | 2,523                | -                                   | 1 (ref) |                   |
|                          | CKD stage 1-2 | 231                  | 136.12                              | 1.70    | (1.49 to 1.93)    |
|                          | G3a           | 567                  | 518.8                               | 1.09    | (1.01 to 1.19)    |
|                          | G3b           | 112                  | 53.2                                | 2.10    | (1.73 to 2.53)    |
|                          | G4-5          | 38                   | 9.6                                 | 3.96    | (2.80 to 5.43)    |
| Cause-specific<br>Cancer | Non-CKD       | 1,389                | -                                   | 1 (ref) |                   |
|                          | CKD stage 1-2 | 117                  | 74.4                                | 1.57    | (1.31 to 1.89)    |
|                          | G3a           | 291                  | 294.3                               | 0.99    | (0.88 to 1.11)    |
|                          | G3b           | 47                   | 30.2                                | 1.56    | (1.15 to 2.07)    |
|                          | G4-5          | 10                   | 5.4                                 | 1.87    | (0.90 to 3.44)    |
| Cardiovascular disease   | Non-CKD       | 418                  | -                                   | 1 (ref) |                   |
|                          | CKD stage 1-2 | 53                   | 22.5                                | 2.35    | (1.76 to 3.08)    |
|                          | G3a           | 127                  | 85.3                                | 1.49    | (1.24 to 1.77)    |
|                          | G3b           | 34                   | 8.9                                 | 3.84    | (2.66 to 5.37)    |
|                          | G4-5          | 15                   | 1.6                                 | 9.32    | (5.22 to 15.67)   |
| Infection                | Non-CKD       | 116                  | -                                   | 1 (ref) |                   |
|                          | CKD stage 1-2 | 14                   | 6.4                                 | 2.18    | (1.19 to 3.65)    |
|                          | G3a           | 23                   | 26.1                                | 0.88    | (0.56 to 1.32)    |
|                          | G3b           | 4                    | 2.8                                 | 1.41    | (0.39 to 3.62)    |
|                          | G4-5          | 1                    | 0.5                                 | 1.96    | (0.05 to 10.93)   |
| Kidney disease           | Non-CKD       | 10                   | -                                   | 1 (ref) |                   |
|                          | CKD stage 1-2 | 0                    | 0.63                                | -       |                   |
|                          | G3a           | 3                    | 2.5                                 | 1.22    | (0.25 to 3.58)    |
|                          | G3b           | 6                    | 0.3                                 | 22.63   | (5.16 to 48.37)   |
|                          | G4-5          | 4                    | 0.05                                | 87.33   | (23.80 to 223.59) |
| Other                    | Non-CKD       | 574                  | -                                   | 1 (ref) |                   |
|                          | CKD stage 1-2 | 47                   | 31.3                                | 1.50    | (1.10 to 2.00)    |
|                          | G3a           | 121                  | 108.5                               | 1.12    | (0.93 to 1.33)    |
|                          | G3b           | 20                   | 11.0                                | 1.83    | (1.12 to 2.82)    |
|                          | G4-5          | 8                    | 2.0                                 | 3.92    | (1.69 to 7.73)    |
| Missing                  | Non-CKD       | 16                   | -                                   | 1 (ref) |                   |
|                          | CKD stage 1-2 | 0                    | 0.88                                | -       |                   |
|                          | G3a           | 2                    | 2.1                                 | 0.96    | (0.12 to 3.47)    |
|                          | G3b           | 1                    | 0.2                                 | 5.24    | (0.13 to 29.32)   |
|                          | G4-5          | 0                    | 0.04                                | -       |                   |

<sup>a</sup> Adjusted for age and sex

CI, confidence interval; CKD, chronic kidney disease.
