# Supplementary material for: The Effect of CKD on Associations between Lifestyle Factors and All-cause, Cancer, and Cardiovascular Mortality: A Population-based Cohort Study
Source: PubMed Central journal article supplement — Intern Med. 2021 Feb 15;60(14):2189–200. doi: 10.2169/internalmedicine.6531-20 (PMC8355404; doi:10.2169/internalmedicine.6531-20), 2021-02-15
Supplement: 1349-7235-60-2189-s008.pdf [file 1349-7235-60-2189-s008.pdf]

**Supplementary material 8.** A chart showing the relative risk of cardiovascular mortality with contributions from different 'exposures.'

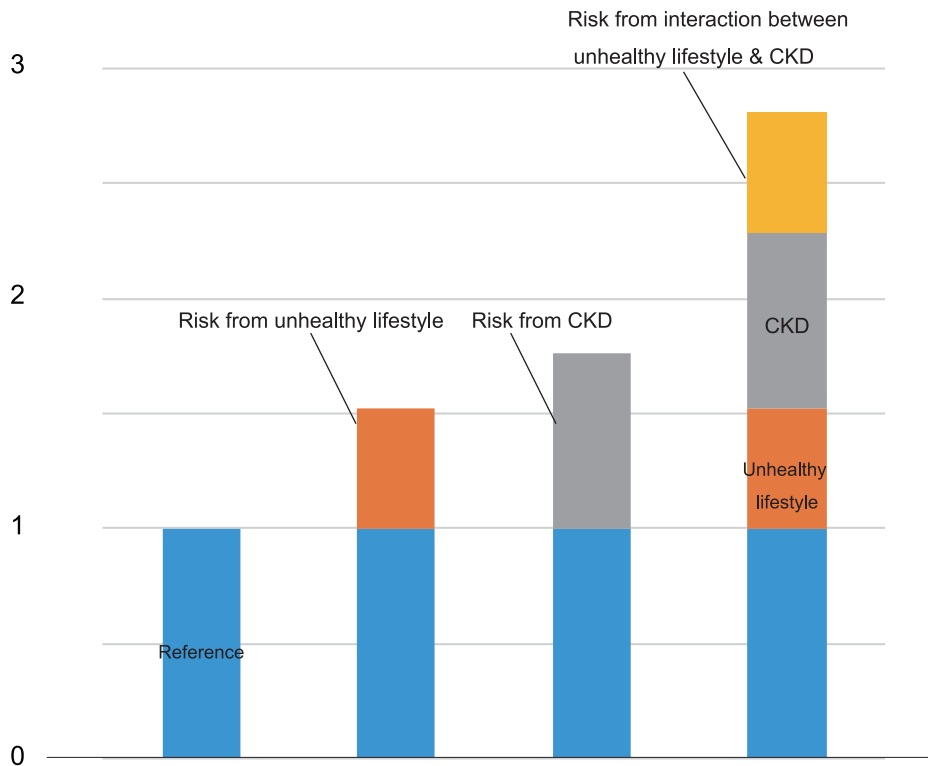

RRs for cardiovascular mortality shown in the table below are plotted above as an example.

Results of cox regression models for different 'exposure' groups used to calculate the measures of biological interaction.

| Exposure                       | RR (95% CI)         |                     |                          |
|--------------------------------|---------------------|---------------------|--------------------------|
|                                | All-cause mortality | Cancer mortality    | Cardiovascular mortality |
| Healthiest in non-CKD group    | 1.00 (ref)          | 1.00 (ref)          | 1.00 (ref)               |
| Least healthy in non-CKD group | 1.84 (1.56 to 2.16) | 1.99 (1.60 to 2.47) | 1.52 (1.04 to 2.22)      |
| Healthiest in CKD group        | 1.50 (1.21 to 1.87) | 1.45 (1.08 to 1.95) | 1.76 (1.11 to 2.81)      |
| Least healthy in CKD group     | 2.34 (1.92 to 2.86) | 2.23 (1.69 to 2.94) | 2.81 (1.85 to 4.29)      |

Adjusted for age, sex, hypertension, diabetes mellitus, hypercholesterolaemia, history of myocardial infarction, history of stroke, and study site.
