# Supplementary material for: The Effect of CKD on Associations between Lifestyle Factors and All-cause, Cancer, and Cardiovascular Mortality: A Population-based Cohort Study
Source: PubMed Central journal article supplement — Intern Med. 2021 Feb 15;60(14):2189–200. doi: 10.2169/internalmedicine.6531-20 (PMC8355404; doi:10.2169/internalmedicine.6531-20), 2021-02-15
Supplement: 1349-7235-60-2189-s009.pdf [file 1349-7235-60-2189-s009.pdf]

**Supplementary material 9.** Cox proportional hazards models of associations between the number of healthy lifestyle factors adhered to, CKD category, and all-cause, cancer, and cardiovascular mortality.

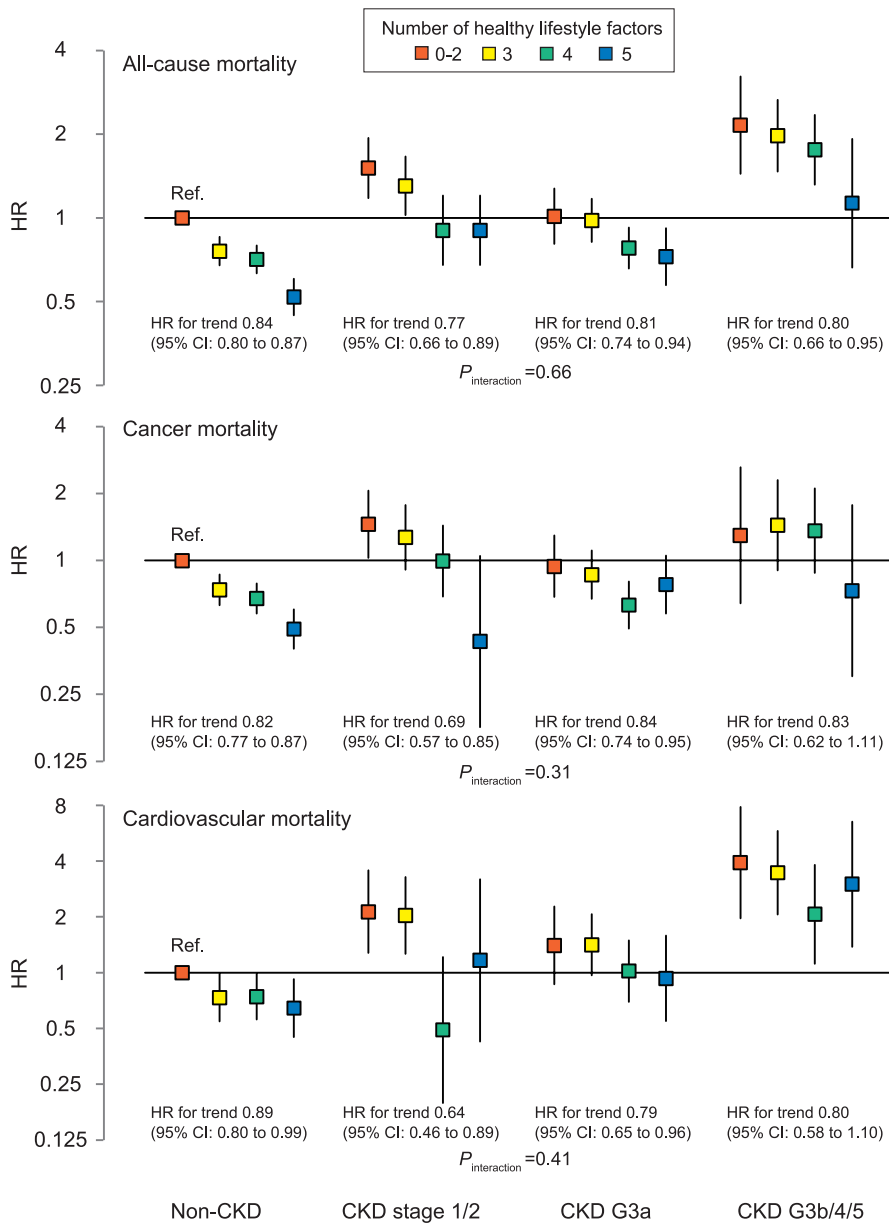

Adjusted for age, sex, hypertension, diabetes mellitus, hypercholesterolaemia, history of myocardial infarction, history of stroke, and study site. Least healthy, non-CKD group is the reference group. CI, confidence interval; HR, hazard ratio. Error bars indicate 95% CIs.
