# Supplementary material for: The Effect of CKD on Associations between Lifestyle Factors and All-cause, Cancer, and Cardiovascular Mortality: A Population-based Cohort Study
Source: PubMed Central journal article supplement — Intern Med. 2021 Feb 15;60(14):2189–200. doi: 10.2169/internalmedicine.6531-20 (PMC8355404; doi:10.2169/internalmedicine.6531-20), 2021-02-15
Supplement: 1349-7235-60-2189-s011.pdf [file 1349-7235-60-2189-s011.pdf]

**Supplementary material 11.** Associations between healthy lifestyle score and all-cause, cancer, and cardiovascular mortality by CKD status, excluding BMI <18.5 kg/m<sup>2</sup>

|                          | All-cause mortality |               |                        | Cancer mortality |                        | Cardiovascular mortality |                        |
|--------------------------|---------------------|---------------|------------------------|------------------|------------------------|--------------------------|------------------------|
|                          | No. of participants | No. of deaths | HR (95% CI)            | No. of deaths    | HR (95% CI)            | No. of deaths            | HR (95% CI)            |
| <b>Non-CKD</b>           |                     |               |                        |                  |                        |                          |                        |
| Linear                   | 189,771             | 2,177         | 0.84<br>(0.80 to 0.88) | 1,213            | 0.84<br>(0.79 to 0.89) | 363                      | 0.88<br>(0.78 to 0.99) |
| Categories               |                     |               |                        |                  |                        |                          |                        |
| 0-2                      | 27,300              | 454           | 1.00 (ref)             | 245              | 1.00 (ref)             | 77                       | 1.00 (ref)             |
| 3                        | 52,315              | 639           | 0.78<br>(0.69 to 0.88) | 352              | 0.76<br>(0.65 to 0.90) | 104                      | 0.74<br>(0.55 to 0.99) |
| 4                        | 79,735              | 819           | 0.72<br>(0.64 to 0.81) | 469              | 0.72<br>(0.61 to 0.85) | 129                      | 0.68<br>(0.51 to 0.92) |
| 5 (healthiest)           | 30,421              | 265           | 0.56<br>(0.48 to 0.66) | 147              | 0.53<br>(0.43 to 0.66) | 53                       | 0.69<br>(0.48 to 1.00) |
| HR for trend             |                     |               | 0.84<br>(0.80 to 0.88) |                  | 0.84<br>(0.79 to 0.89) |                          | 0.88<br>(0.79 to 0.99) |
| <b>CKD</b>               |                     |               |                        |                  |                        |                          |                        |
| Linear                   | 42,586              | 829           | 0.82<br>(0.76 to 0.88) | 411              | 0.81<br>(0.73 to 0.90) | 203                      | 0.80<br>(0.67 to 0.91) |
| Categories               |                     |               |                        |                  |                        |                          |                        |
| 0-2                      | 6,434               | 174           | 1.00 (ref)             | 86               | 1.00 (ref)             | 46                       | 1.00 (ref)             |
| 3                        | 12,120              | 280           | 0.89<br>(0.74 to 1.08) | 139              | 0.89<br>(0.68 to 1.17) | 77                       | 0.90<br>(0.62 to 1.31) |
| 4                        | 16,790              | 267           | 0.65<br>(0.54 to 0.80) | 129              | 0.61<br>(0.46 to 0.81) | 55                       | 0.54<br>(0.36 to 0.80) |
| 5 (healthiest)           | 7,242               | 108           | 0.61<br>(0.47 to 0.78) | 57               | 0.60<br>(0.43 to 0.85) | 25                       | 0.59<br>(0.36 to 0.97) |
| HR for trend             |                     |               | 0.82<br>(0.76 to 0.89) |                  | 0.81<br>(0.73 to 0.90) |                          | 0.78<br>(0.67 to 0.91) |
| <i>P</i> for interaction |                     |               | 0.91                   |                  | 0.91                   |                          | 0.23                   |

All analyses were adjusted for age, sex, hypertension, diabetes mellitus, hypercholesterolemia, history of myocardial infarction, history of stroke, and study site.

HR for trend indicates the change in HR by one lifestyle category change towards healthiest.

*P* for interaction shows the results of fitting an interaction term between the healthy lifestyle score category and CKD status.

BMI, body mass index; CI, confidence interval; HR, hazard ratio.
