# Supplementary material for: The Effect of CKD on Associations between Lifestyle Factors and All-cause, Cancer, and Cardiovascular Mortality: A Population-based Cohort Study
Source: PubMed Central journal article supplement — Intern Med. 2021 Feb 15;60(14):2189–200. doi: 10.2169/internalmedicine.6531-20 (PMC8355404; doi:10.2169/internalmedicine.6531-20), 2021-02-15
Supplement: 1349-7235-60-2189-s014.pdf [file 1349-7235-60-2189-s014.pdf]

**Supplementary material 14.** Hazard ratio and 95% CI for all-cause, cancer, and cardiovascular mortality according to each component of the healthy lifestyle score in the entire study population

|                          | No smoking             | BMI <25<br>kg/m <sup>2</sup> | Exercise               | Healthy eating<br>habits | Alcohol<br><20 g/day   |
|--------------------------|------------------------|------------------------------|------------------------|--------------------------|------------------------|
| All-cause mortality      | 0.58<br>(0.53 to 0.63) | 1.07<br>(0.98 to 1.16)       | 0.77<br>(0.71 to 0.83) | 0.85<br>(0.78 to 0.93)   | 1.09<br>(0.99 to 1.19) |
| Cancer mortality         | 0.57<br>(0.51 to 0.64) | 0.96<br>(0.86 to 1.08)       | 0.82<br>(0.74 to 0.91) | 0.89<br>(0.79 to 1.00)   | 0.99<br>(0.88 to 1.12) |
| Cardiovascular mortality | 0.54<br>(0.44 to 0.66) | 1.12<br>(0.94 to 1.35)       | 0.75<br>(0.63 to 0.90) | 0.92<br>(0.75 to 1.13)   | 1.13<br>(0.91 to 1.39) |

The ‘unhealthy’ category (e.g., current smoker) was used as the reference category for each lifestyle factor. All analyses were adjusted for age, sex, CKD, hypertension, diabetes mellitus, hypercholesterolemia, history of myocardial infarction, history of stroke, study site, and other lifestyle factors. BMI, body mass, index; CI, confidence interval.
