# Supplementary material for: The Effect of CKD on Associations between Lifestyle Factors and All-cause, Cancer, and Cardiovascular Mortality: A Population-based Cohort Study
Source: PubMed Central journal article supplement — Intern Med. 2021 Feb 15;60(14):2189–200. doi: 10.2169/internalmedicine.6531-20 (PMC8355404; doi:10.2169/internalmedicine.6531-20), 2021-02-15
Supplement: 1349-7235-60-2189-s015.pdf [file 1349-7235-60-2189-s015.pdf]

**Supplementary material 15.** Cox proportional hazards models of associations between each component of the healthy lifestyle score, CKD category, and all-cause, cancer, and cardiovascular mortality

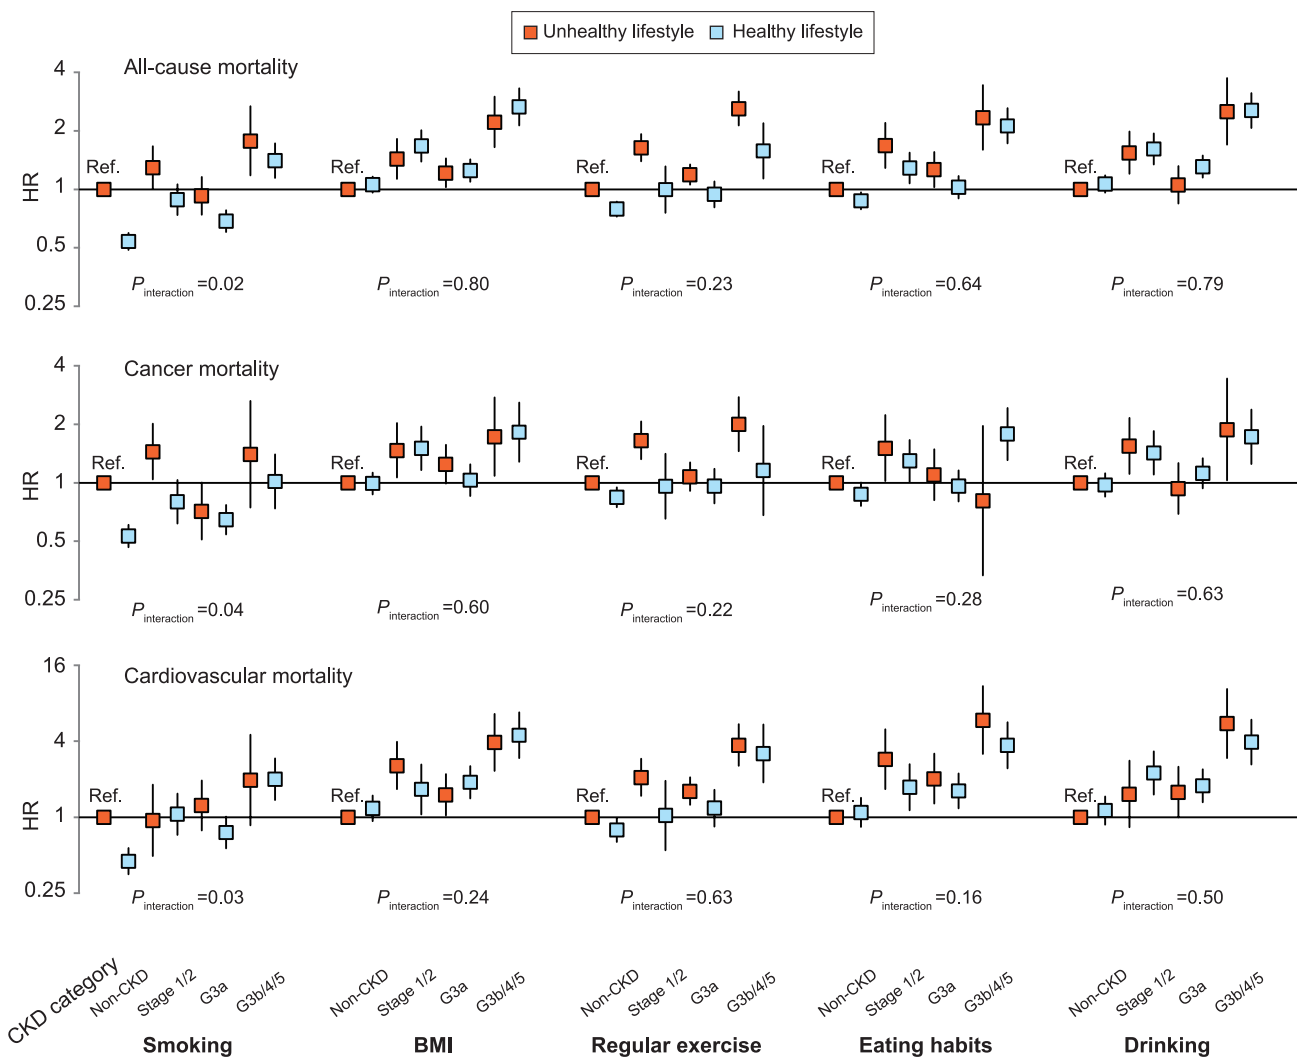

Adjusted for age, sex, hypertension, diabetes mellitus, hypercholesterolaemia, history of myocardial infarction, history of stroke, study site, and other lifestyle factors.

$P$  for interaction shows the results of fitting an interaction term between each component of the healthy lifestyle score and CKD category (i.e. each component \* CKD category).

Error bars indicate 95% CIs. Unhealthy, non-CKD group is the reference group.

BMI, body mass index; CI, confidence interval; HR, hazard ratio.
