# Supplementary material for: The Effect of CKD on Associations between Lifestyle Factors and All-cause, Cancer, and Cardiovascular Mortality: A Population-based Cohort Study
Source: PubMed Central journal article supplement — Intern Med. 2021 Feb 15;60(14):2189–200. doi: 10.2169/internalmedicine.6531-20 (PMC8355404; doi:10.2169/internalmedicine.6531-20), 2021-02-15
Supplement: 1349-7235-60-2189-s016.pdf [file 1349-7235-60-2189-s016.pdf]

**Supplementary material 16.** Hazard ratio and 95% CI for all-cause, cancer, and cardiovascular mortality according to different combinations of lifestyle factors, stratified by CKD status

|                                                                                            | No. of participants | All-cause mortality |                        | Cancer mortality |                        | Cardiovascular mortality |                        |
|--------------------------------------------------------------------------------------------|---------------------|---------------------|------------------------|------------------|------------------------|--------------------------|------------------------|
|                                                                                            |                     | No. of deaths       | HR (95% CI)            | No. of deaths    | HR (95% CI)            | No. of deaths            | HR (95% CI)            |
| <b>Three significant factors: no smoking, physically active, and healthy eating habits</b> |                     |                     |                        |                  |                        |                          |                        |
| <b>Non-CKD</b>                                                                             |                     |                     |                        |                  |                        |                          |                        |
| Linear                                                                                     | 202,349             | 2,376               | 0.73<br>(0.69 to 0.77) | 1,308            | 0.74<br>(0.69 to 0.80) | 392                      | 0.83<br>(0.73 to 0.83) |
| Categories                                                                                 |                     |                     |                        |                  |                        |                          |                        |
| 0                                                                                          | 7,644               | 144                 | 1.00 (ref)             | 68               | 1.00 (ref)             | 25                       | 1.00 (ref)             |
| 1                                                                                          | 38,792              | 551                 | 0.66<br>(0.55 to 0.80) | 305              | 0.74<br>(0.57 to 0.96) | 85                       | 0.57<br>(0.36 to 0.89) |
| 2                                                                                          | 107,809             | 1,214               | 0.51<br>(0.43 to 0.61) | 662              | 0.55<br>(0.42 to 0.71) | 203                      | 0.45<br>(0.30 to 0.69) |
| 3<br>(healthiest)                                                                          | 48,104              | 467                 | 0.37<br>(0.30 to 0.44) | 273              | 0.41<br>(0.31 to 0.54) | 79                       | 0.33<br>(0.21 to 0.53) |
| <b>CKD</b>                                                                                 |                     |                     |                        |                  |                        |                          |                        |
| Linear                                                                                     | 44,449              | 887                 | 0.74<br>(0.68 to 0.80) | 436              | 0.79<br>(0.70 to 0.89) | 217                      | 0.73<br>(0.61 to 0.86) |
| Categories                                                                                 |                     |                     |                        |                  |                        |                          |                        |
| 0                                                                                          | 1,401               | 51                  | 1.00 (ref)             | 23               | 1.00 (ref)             | 11                       | 1.00 (ref)             |
| 1                                                                                          | 7,779               | 191                 | 0.62<br>(0.46 to 0.85) | 89               | 0.63<br>(0.40 to 0.99) | 48                       | 0.73<br>(0.38 to 1.40) |
| 2                                                                                          | 22,819              | 451                 | 0.51<br>(0.38 to 0.68) | 215              | 0.52<br>(0.33 to 0.80) | 115                      | 0.59<br>(0.31 to 1.10) |
| 3<br>(healthiest)                                                                          | 12,450              | 194                 | 0.35<br>(0.26 to 0.49) | 109              | 0.42<br>(0.27 to 0.66) | 43                       | 0.37<br>(0.19 to 0.73) |
| <i>P</i> for interaction                                                                   |                     |                     | 0.88                   |                  | 0.75                   |                          | 0.79                   |
| <b>Four factors: three factors above and BMI &lt;25 kg/m<sup>2</sup></b>                   |                     |                     |                        |                  |                        |                          |                        |
| <b>Non-CKD</b>                                                                             |                     |                     |                        |                  |                        |                          |                        |
| Linear                                                                                     | 202,349             | 2,376               | 0.80<br>(0.76 to 0.84) | 1,308            | 0.80<br>(0.75 to 0.86) | 392                      | 0.83<br>(0.74 to 0.93) |
| Categories                                                                                 |                     |                     |                        |                  |                        |                          |                        |
| 0-1                                                                                        | 17,348              | 285                 | 1.00 (ref)             | 141              | 1.00 (ref)             | 51                       | 1.00 (ref)             |
| 2                                                                                          | 53,343              | 693                 | 0.76<br>(0.66 to 0.87) | 389              | 0.82<br>(0.68 to 0.99) | 104                      | 0.63<br>(0.45 to 0.89) |
| 3                                                                                          | 92,885              | 1,051               | 0.68<br>(0.59 to 0.77) | 577              | 0.69<br>(0.57 to 0.84) | 178                      | 0.65<br>(0.47 to 0.90) |
| 4<br>(healthiest)                                                                          | 37,773              | 347                 | 0.47<br>(0.40 to 0.56) | 201              | 0.50<br>(0.40 to 0.63) | 59                       | 0.47<br>(0.32 to 0.70) |
| HR for trend                                                                               |                     |                     | 0.80<br>(0.76 to 0.84) |                  | 0.80<br>(0.75 to 0.86) |                          | 0.83<br>(0.74 to 0.93) |
| <b>CKD</b>                                                                                 |                     |                     |                        |                  |                        |                          |                        |
| Linear                                                                                     | 44,449              | 887                 | 0.82<br>(0.76 to 0.88) | 436              | 0.82<br>(0.74 to 0.91) | 217                      | 0.80<br>(0.69 to 0.93) |
| Categories                                                                                 |                     |                     |                        |                  |                        |                          |                        |
| 0-1                                                                                        | 4,347               | 109                 | 1.00 (ref)             | 53               | 1.00 (ref)             | 25                       | 1.00 (ref)             |
| 2                                                                                          | 12,180              | 299                 | 0.95<br>(0.76 to 1.18) | 142              | 0.90<br>(0.66 to 1.24) | 89                       | 1.24<br>(0.79 to 1.93) |
| 3                                                                                          | 19,057              | 341                 | 0.72<br>(0.58 to 0.89) | 166              | 0.66<br>(0.48 to 0.91) | 70                       | 0.70<br>(0.44 to 1.11) |
| 4<br>(healthiest)                                                                          | 8,865               | 138                 | 0.59<br>(0.46 to 0.76) | 75               | 0.59<br>(0.42 to 0.85) | 33                       | 0.71<br>(0.42 to 1.20) |
| HR for trend                                                                               |                     |                     | 0.82<br>(0.76 to 0.88) |                  | 0.82<br>(0.74 to 0.91) |                          | 0.80<br>(0.69 to 0.93) |
| <i>P</i> for interaction                                                                   |                     |                     | 0.17                   |                  | 0.61                   |                          | 0.01                   |

All analyses were adjusted for age, sex, hypertension, diabetes mellitus, hypercholesterolemia, history of myocardial infarction, history of stroke, and study site. BMI, body mass index; CI, confidence interval; HR, hazard ratio. HR for trend indicates the change in HR by one lifestyle category change towards healthiest. *P* for interaction shows the results of fitting an interaction term between the lifestyle score category and CKD.
